# Supplementary material for: Inducible localized delivery of an anti-PD-1 scFv enhances anti-tumor activity of ROR1 CAR-T cells in TNBC
Source: Springer Nature journal article supplement (doi:10.1186/s13058-022-01531-1), 2022-06-03

# Figure S1

**A**

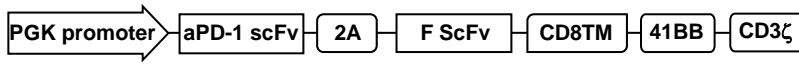

**B**

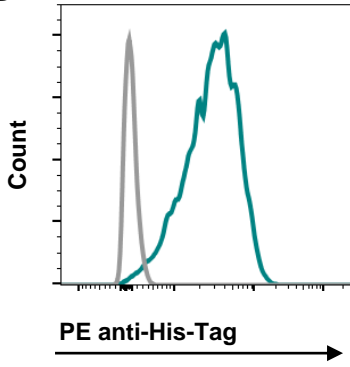

— Supernatant from untransduced 293-T cells

— Supernatant from transduced 293-T cells

**C**

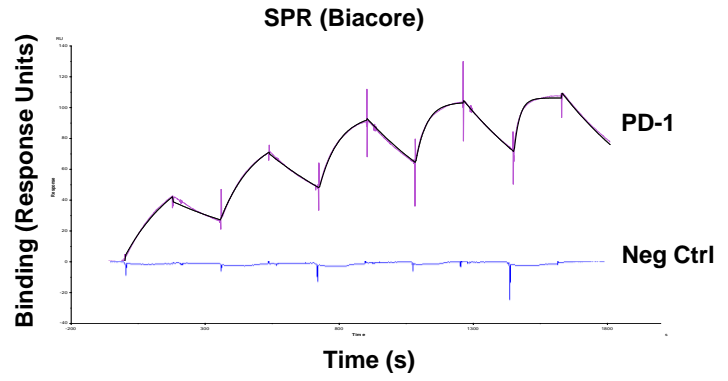

Figure S2

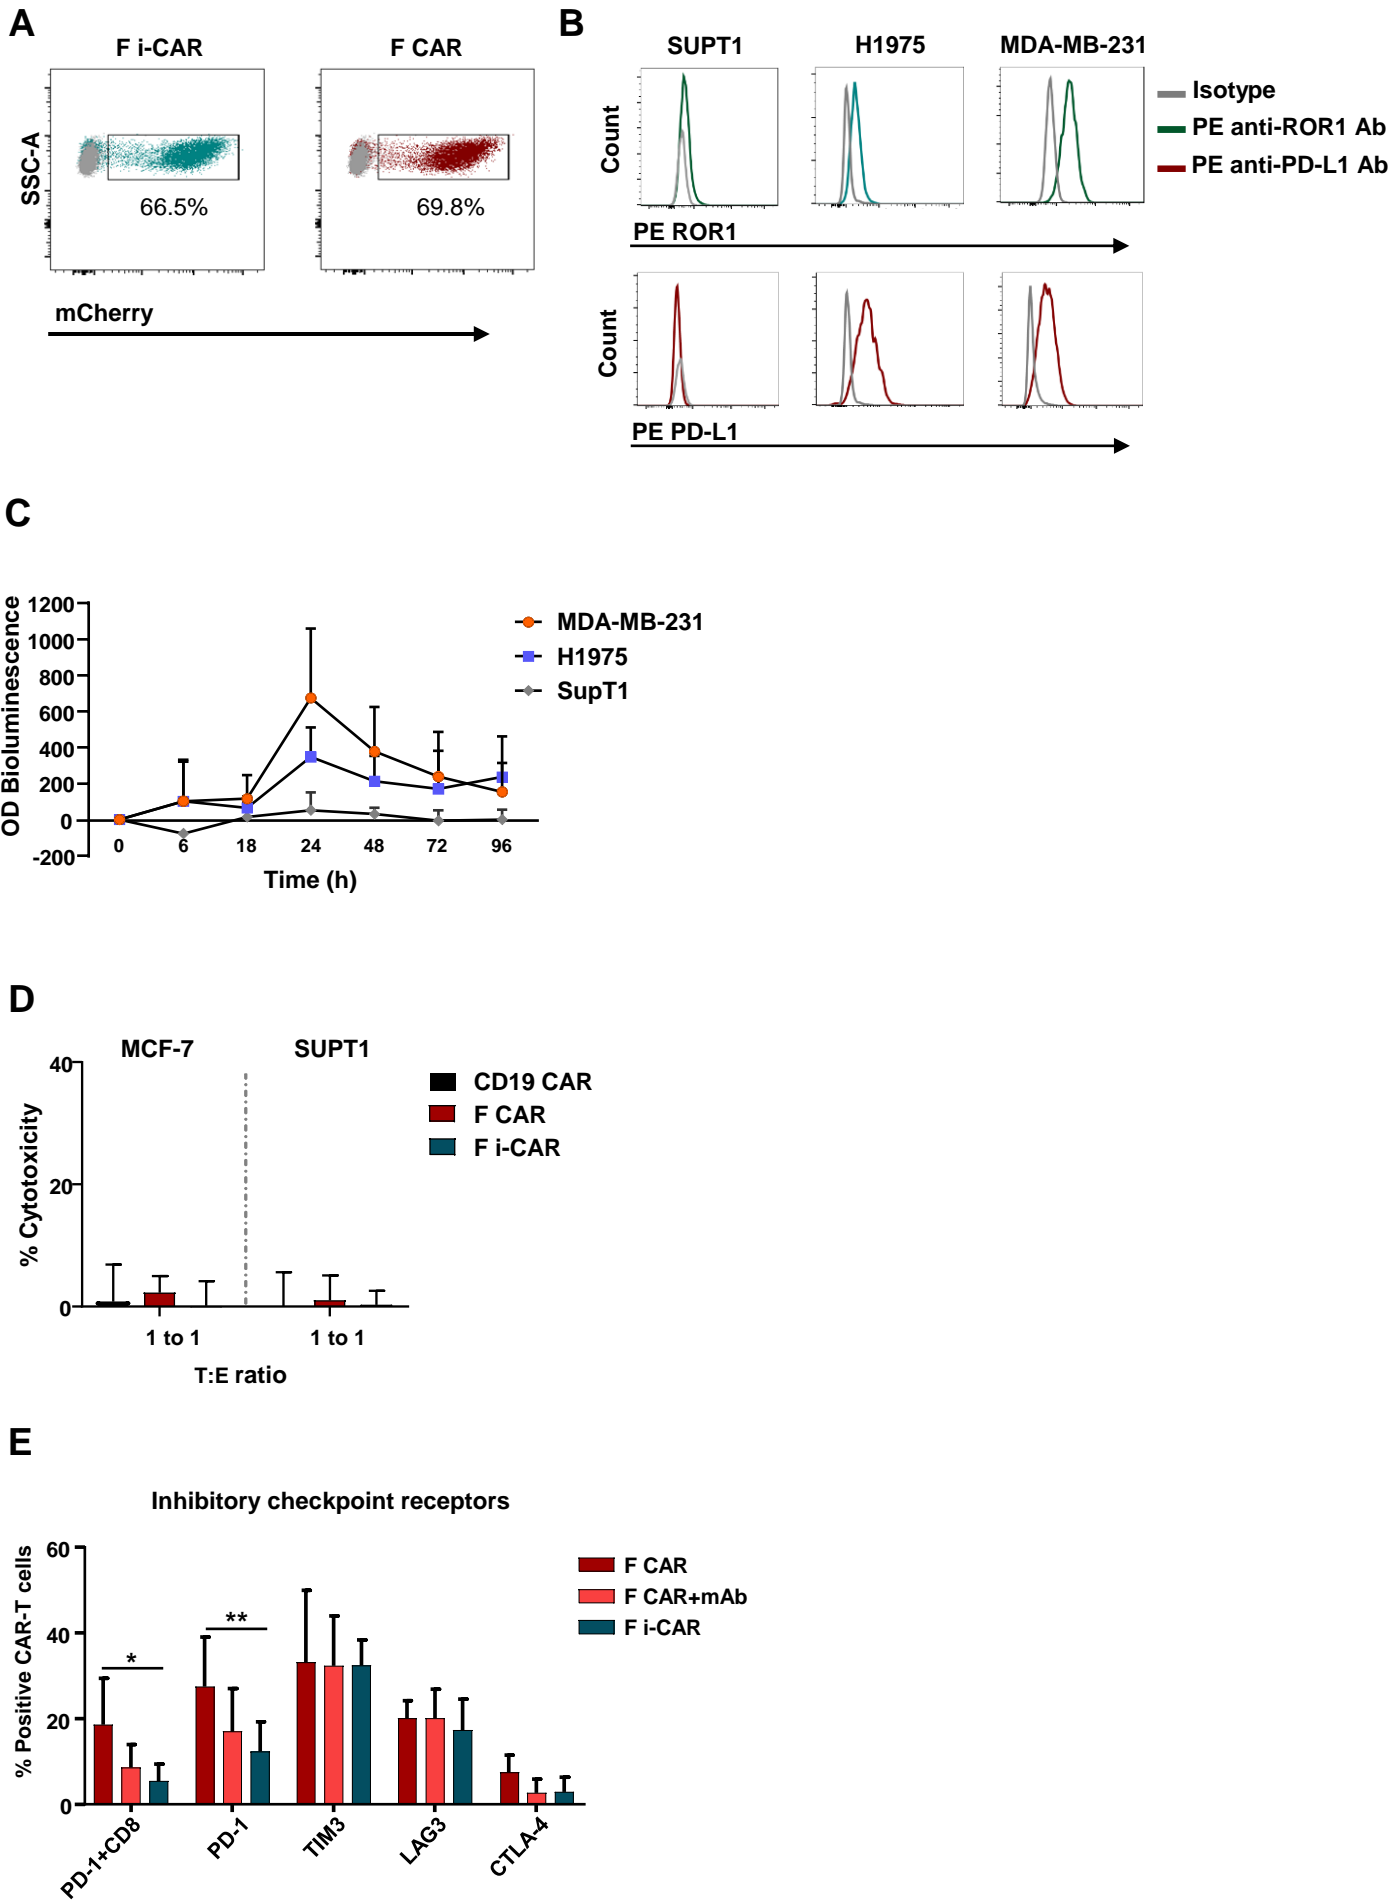

# Figure S3

**A**

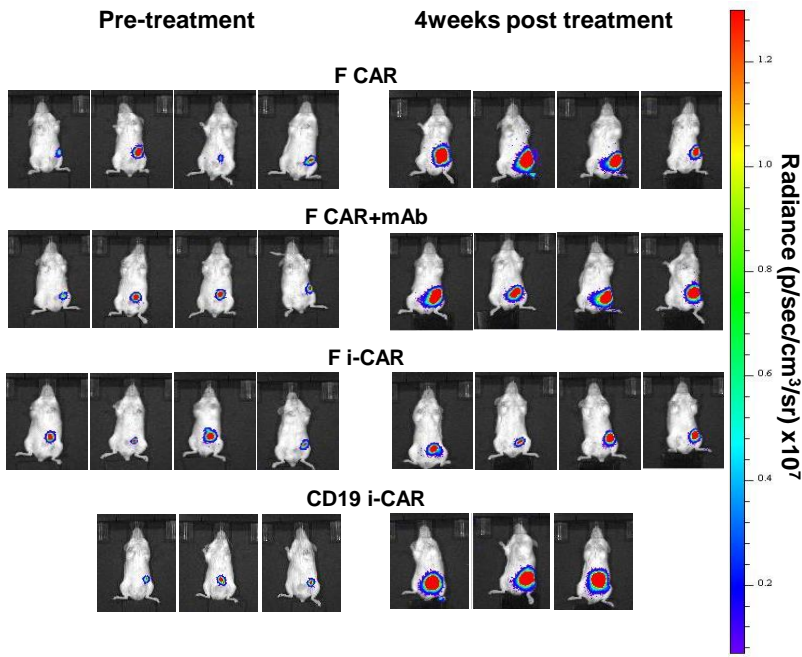

**B** Tumor volume post-CAR T cell treatment

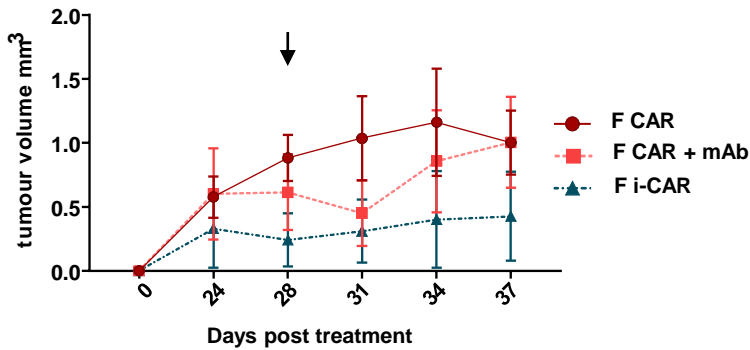

**C** Mouse weight over time

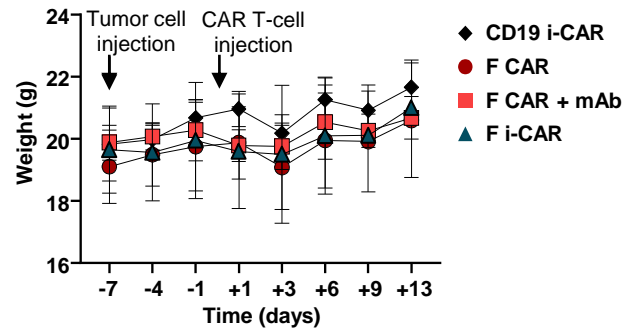

**D**

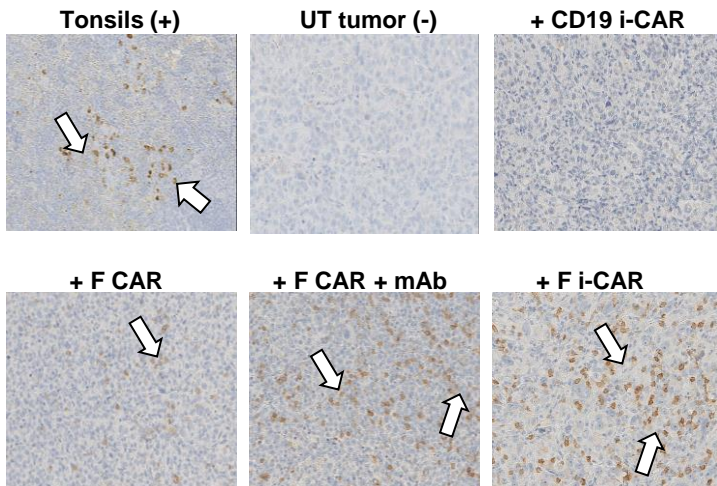

# Figure S4

## A

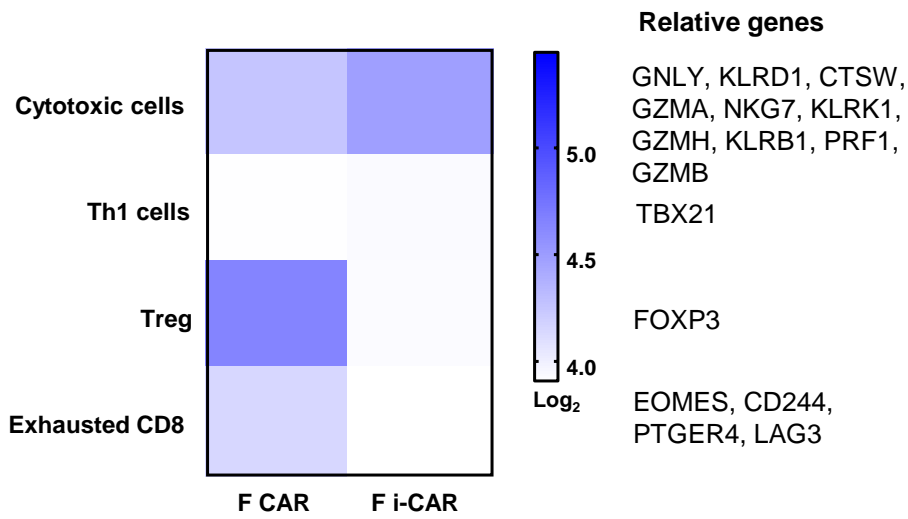

## B

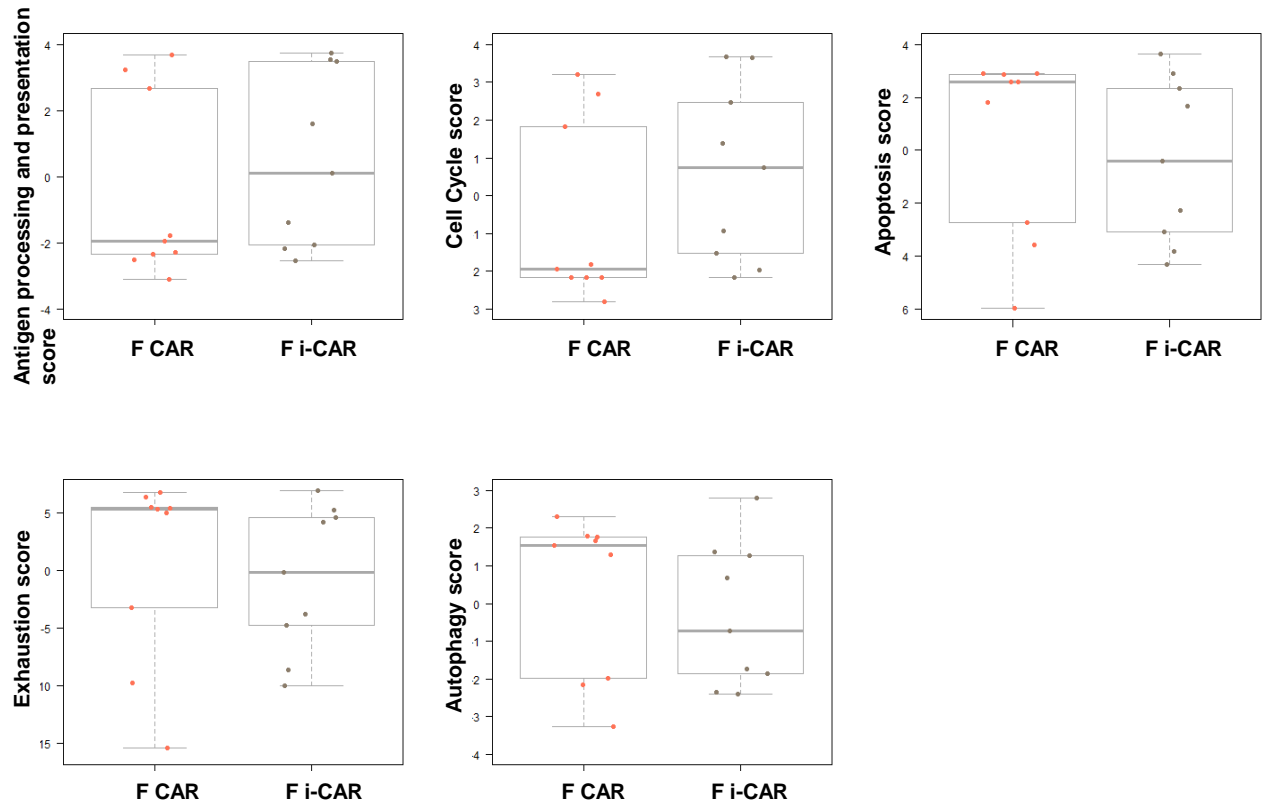

Supplement: MOESM1 [file 23125536]
